# Supplementary material
Source: PubMed Central journal article supplement (PMC8357424)
Supplement: mmc1.pdf [file mmc1.pdf]

## Supplemental information

### Reduced neutralization of SARS-CoV-2 B.1.617

#### by vaccine and convalescent serum

Chang Liu, Helen M. Ginn, Wanwisa Dejnirattisai, Piyada Supasa, Beibei Wang, Aekkachai Tuekprakhon, Rungtiwa Nutalai, Daming Zhou, Alexander J. Mentzer, Yuguang Zhao, Helen M.E. Duyvesteyn, César López-Camacho, Jose Slon-Campos, Thomas S. Walter, Donal Skelly, Sile Ann Johnson, Thomas G. Ritter, Chris Mason, Sue Ann Costa Clemens, Felipe Gomes Naveca, Valdinete Nascimento, Fernanda Nascimento, Cristiano Fernandes da Costa, Paola Cristina Resende, Alex Pauvolid-Correa, Marilda M. Siqueira, Christina Dold, Nigel Temperton, Tao Dong, Andrew J. Pollard, Julian C. Knight, Derrick Crook, Teresa Lambe, Elizabeth Clutterbuck, Sagida Bibi, Amy Flaxman, Mustapha Bittaye, Sandra Belij-Rammerstorfer, Sarah C. Gilbert, Tariq Malik, Miles W. Carroll, Paul Klenerman, Eleanor Barnes, Susanna J. Dunachie, Vicky Baillie, Natali Serafin, Zanele Ditse, Kelly Da Silva, Neil G. Paterson, Mark A. Williams, David R. Hall, Shabir Madhi, Marta C. Nunes, Philip Goulder, Elizabeth E. Fry, Juthathip Mongkolsapaya, Jingshan Ren, David I. Stuart, and Gavin R. Screaton



**Table S2 Data collection and refinement statistics of RBD complexes.** Related to X-ray data collection, structure determination and refinement, STAR Methods

<sup>a</sup> Values in parentheses are for highest-resolution shell.

| Structure                             | RBD/222-278                                   | L452R-RBD/75-253    | T478K-RBD/45-253    |
|---------------------------------------|-----------------------------------------------|---------------------|---------------------|
| PDB ID                                | 7OR9                                          | 7ORB                | 7ORA                |
| Data collection                       |                                               |                     |                     |
| Space group                           | P2 <sub>1</sub> 2 <sub>1</sub> 2 <sub>1</sub> | P2 <sub>1</sub>     | P2 <sub>1</sub>     |
| Cell dimensions                       |                                               |                     |                     |
| a, b, c (Å)                           | 70.7, 114.5, 177.9                            | 93.2, 149.4, 115.0  | 51.6, 182.4, 142.4  |
| a, b, g (°)                           | 90, 90, 90                                    | 90, 92.0, 90        | 90, 93.0, 90        |
| Resolution (Å)                        | 70–2.34 (2.38–2.34) <sup>a</sup>              | 75–2.50 (2.54–2.50) | 61–2.60 (2.64–2.60) |
| R <sub>merge</sub>                    | 0.100 (---)                                   | 0.300 (---)         | 0.245 (---)         |
| R <sub>pim</sub>                      | 0.030 (0.806)                                 | 0.058 (0.386)       | 0.101 (0.860)       |
| I/s(I)                                | 16.8 (0.8)                                    | 5.6 (0.4)           | 7.3 (0.6)           |
| CC <sub>1/2</sub>                     | 0.999 (0.348)                                 | 0.993 (0.609)       | 0.986 (0.302)       |
| Completeness (%)                      | 86.2 (47.5)                                   | 99.8 (94.6)         | 90.5 (49.0)         |
| Redundancy                            | 11.6 (5.2)                                    | 28.1 (26.4)         | 6.7 (6.6)           |
| Refinement                            |                                               |                     |                     |
| Resolution (Å)                        | 57–2.34                                       | 74–2.50             | 52–2.60             |
| No. reflections                       | 50501/2653                                    | 102853/5504         | 68969/3634          |
| R <sub>work</sub> / R <sub>free</sub> | 0.197/0.233                                   | 0.212/0.252         | 0.208/0.249         |
| No. atoms                             |                                               |                     |                     |
| Protein                               | 8070                                          | 16156               | 16276               |
| Ligand/ion/water                      | 216                                           | 808                 | 390                 |
| B factors (Å <sup>2</sup> )           |                                               |                     |                     |
| Protein                               | 61                                            | 64                  | 66                  |
| Ligand/ion/water                      | 67                                            | 73                  | 57                  |
| r.m.s. deviations                     |                                               |                     |                     |
| Bond lengths (Å)                      | 0.002                                         | 0.003               | 0.002               |
| Bond angles (°)                       | 0.6                                           | 0.6                 | 0.6                 |

**Table S3.** NT50 titres against pseudo typed lentiviruses expressing full-length spike of SARS-CoV-2 strains Victoria and B.1.617.1, and live virus strains Victoria and B.1.617.2 (A) 34 convalescent plasma during early pandemic in UK (B) plasma from 18 patients infected with B.1.1.7 (C) serum from 14 patients infected with B.1.351 (D) serum from 17 patients infected with P.1 . The data underpinning the Victoria live virus neutralization curves of convalescent samples have been previously reported (Supasa et al, 2021). Related to Figure5 and 6.

|                 | NT50 (Reciprocal plasma dilution) |           |                 |           | NT50 ratio      |                 |
|-----------------|-----------------------------------|-----------|-----------------|-----------|-----------------|-----------------|
|                 | Pseudo virus                      |           | Authentic virus |           | Victoria/B.1.67 | Victoria/B.1.61 |
|                 | Victoria                          | B.1.617.1 | Victoria        | B.1.617.2 | 1.1             | 7.2             |
| Convalescent 1  | 99                                | <20       | 61              | <20       | >5.0            | >3.1            |
| Convalescent 2  | 1098                              | 165       | 689             | 41        | 6.7             | 16.6            |
| Convalescent 3  | 677                               | 677       | 526             | 231       | 1.0             | 2.3             |
| Convalescent 4  | 992                               | 817       | 409             | 445       | 1.2             | 0.9             |
| Convalescent 5  | 1016                              | 54        | 369             | 136       | 18.8            | 2.7             |
| Convalescent 6  | 1417                              | 820       | 1270            | 460       | 1.7             | 2.8             |
| Convalescent 7  | 716                               | 115       | 274             | 124       | 6.2             | 2.2             |
| Convalescent 8  | 474                               | 288       | 633             | 360       | 1.6             | 1.8             |
| Convalescent 9  | N/A                               | N/A       | 667             | 81        | N/A             | 8.2             |
| Convalescent 10 | N/A                               | N/A       | 124             | <20       | N/A             | >6.2            |
| Convalescent 11 | N/A                               | N/A       | 102             | 127       | N/A             | 0.8             |
| Convalescent 12 | 585                               | 97        | 339             | 95        | 6.0             | 3.6             |
| Convalescent 13 | 362                               | 214       | 331             | 55        | 1.7             | 6.0             |
| Convalescent 14 | 514                               | 52        | 438             | 465       | 9.9             | 0.9             |
| Convalescent 15 | 8300                              | 7086      | 6397            | 2916      | 1.2             | 2.2             |
| Convalescent 16 | 124                               | <20       | 44              | <20       | >6.2            | >2.2            |
| Convalescent 17 | 1188                              | 33        | 1115            | 239       | 35.6            | 4.7             |
| Convalescent 18 | 480                               | 85        | 242             | 71        | 5.7             | 3.4             |
| Convalescent 19 | 78                                | 19        | 29              | <20       | 4.2             | >1.5            |
| Convalescent 20 | 552                               | 204       | 154             | 60        | 2.7             | 2.6             |
| Convalescent 21 | 894                               | 135       | 487             | 76        | 6.6             | 6.4             |
| Convalescent 22 | 1596                              | 497       | 438             | 236       | 3.2             | 1.9             |
| Convalescent 23 | 661                               | 135       | 381             | 189       | 4.9             | 2.0             |
| Convalescent 24 | 2976                              | 405       | 1647            | 900       | 7.4             | 1.8             |
| Convalescent 25 | 2609                              | 750       | 913             | 747       | 3.5             | 1.2             |
| Convalescent 26 | 1677                              | 424       | 1880            | 832       | 4.0             | 2.3             |
| Convalescent 27 | 1664                              | 227       | 1464            | 829       | 7.3             | 1.8             |
| Convalescent 28 | 652                               | 333       | 361             | 621       | 2.0             | 0.6             |
| Convalescent 29 | 3117                              | 982       | 2859            | 1143      | 3.2             | 2.5             |
| Convalescent 30 | 1341                              | 447       | 1109            | 425       | 3.0             | 2.6             |
| Convalescent 31 | 1518                              | 454       | 811             | 556       | 3.3             | 1.5             |
| Convalescent 32 | 764                               | 567       | 395             | 317       | 1.3             | 1.2             |
| Convalescent 33 | N/A                               | N/A       | 1144            | 302       | N/A             | 3.8             |
| Convalescent 34 | 1289                              | 830       | 676             | 150       | 1.6             | 4.5             |
| B.1.1.7 P3      | 101                               | 27        | 143             | 39        | 3.7             | 3.7             |
| B.1.1.7 P4      | 22442                             | 15436     | 88889           | 109481    | 1.5             | 0.8             |
| B.1.1.7 P5      | 1423                              | 107       | 1839            | 384       | 13.3            | 4.8             |
| B.1.1.7 P6      | 655                               | 69        | 562             | 54        | 9.5             | 10.4            |
| B.1.1.7 P7      | 2073                              | 1623      | 2936            | 3049      | 1.3             | 1.0             |
| B.1.1.7 P8      | 2459                              | 749       | 4696            | 535       | 3.3             | 8.8             |
| B.1.1.7 P9      | 2046                              | 145       | 1777            | 533       | 14.1            | 3.3             |
| B.1.1.7 P10     | 3019                              | 373       | 2484            | 1182      | 8.1             | 2.1             |
| B.1.1.7 P11     | 3243                              | 205       | 1632            | 532       | 15.8            | 3.1             |
| B.1.1.7 P14     | 1444                              | 665       | 1555            | 911       | 2.2             | 1.7             |
| B.1.1.7 P15     | 174                               | 79        | 227             | 778       | 2.2             | 0.3             |
| B.1.1.7 P16     | 1463                              | 292       | 2902            | 2016      | 5.0             | 1.4             |
| B.1.1.7 P17     | 803                               | 415       | 3781            | 566       | 1.9             | 6.7             |
| B.1.1.7 P18     | 990                               | 466       | 2641            | 732       | 2.1             | 3.6             |
| B.1.1.7 P19     | 575                               | 54        | 775             | 211       | 10.7            | 3.7             |
| B.1.1.7 P20     | 1647                              | 1197      | 2614            | 1509      | 1.4             | 1.7             |
| B.1.1.7 P22     | 422                               | 172       | 390             | 182       | 2.4             | 2.1             |
| B.1.1.7 P23     | 2243                              | 504       | 864             | 185       | 4.4             | 4.7             |
| SA01            | 586                               | 402       | 379             | 214       | 1.5             | 1.8             |
| SA02            | 564                               | 876       | 597             | 629       | 0.6             | 0.9             |
| SA03            | 107                               | 18        | 71              | <20       | 5.9             | >3.55           |
| SA04            | 824                               | 1231      | 240             | 293       | 0.7             | 0.8             |
| SA05            | 166                               | 27        | 67              | <20       | 6.1             | >3.35           |
| SA06            | 295                               | 121       | 69              | <20       | 2.4             | >3.45           |
| SA07            | 1384                              | 508       | 463             | 374       | 2.7             | 1.2             |
| SA08            | 360                               | 239       | 641             | 30        | 1.5             | 21.7            |
| SA09            | 584                               | 259       | 888             | <20       | 2.3             | >44.4           |
| SA10            | 57                                | 98        | 80              | <20       | 0.6             | >4.4            |
| SA11            | 530                               | 379       | 1234            | 83        | 1.4             | 14.9            |
| SA12            | 1026                              | 1142      | 2148            | 390       | 0.9             | 5.5             |
| SA13            | 53                                | 10        | 268             | <20       | 5.1             | >13.4           |
| SA14            | 678                               | 511       | 595             | 123       | 1.3             | 4.8             |
| P.1-1           | 274                               | 125       | 86              | <20       | 2.2             | >4.3            |
| P.1-2           | 21                                | 22        | <20             | <20       | 1.0             | N/A             |
| P.1-3           | 108                               | 58        | 20              | <20       | 1.9             | N/A             |
| P.1-4           | 152                               | 116       | 29              | <20       | 1.3             | >1.4            |
| P.1-5           | 56                                | 31        | <20             | <20       | 1.8             | N/A             |
| P.1-6           | 1751                              | 1039      | 2505            | 1311      | 1.7             | 1.9             |
| P.1-7           | 313                               | 12        | 123             | <20       | 25.1            | >6.1            |
| P.1-8           | 151                               | 100       | 40              | <20       | 1.5             | >2.0            |
| P.1-9           | 111                               | 107       | 23              | <20       | 1.0             | >1.2            |
| P.1-10          | 107                               | 19        | <20             | <20       | 5.5             | N/A             |
| P.1-11          | 157                               | 82        | 123             | <20       | 1.9             | >6.2            |
| P.1-12          | 62                                | 48        | <20             | <20       | 1.3             | N/A             |
| P.1-13          | 202                               | 87        | <20             | <20       | 2.3             | N/A             |
| P.1-14          | 121                               | 39        | 87              | <20       | 3.1             | >4.3            |
| P.1-15          | 1555                              | 2050      | 8199            | 2551      | 0.8             | 3.2             |
| P.1-16          | 337                               | 194       | 828             | 333       | 1.7             | 2.5             |
| P.1-17          | 1489                              | 364       | 1654            | 227       | 4.1             | 7.3             |

**Table S4.** NT50 titres against pseudo typed lentiviruses expressing full-length spike of SARS-CoV-2 strains Victoria and B.1.617.1, and strains Victoria and B.1.617.2 (A) Serum from 25 recipients of Pfizer-BioNTech vaccine. (B) Oxford-AstraZeneca vaccine. The data underpinning the Victoria live virus neutralization curves have been previously reported (Supasa et al, 2021). Related to Figure7.

|                | Day Post-boost | NT50 (Reciprocal plasma dilution) |           |                 |           | NT50 ratio         |                    |
|----------------|----------------|-----------------------------------|-----------|-----------------|-----------|--------------------|--------------------|
|                |                | Pseudovirus                       |           | Authentic virus |           | Victoria/B.1.671.1 | Victoria/B.1.617.2 |
|                |                | Victoria                          | B.1.617.1 | Victoria        | B.1.617.2 |                    |                    |
| Pfizer1        | 7              | 1575                              | 790       | 1149            | 540       | 2.0                | 2.1                |
| Pfizer2        | 7              | 82                                | 10        | 10              | 10        | 8.2                | 1.0                |
| Pfizer3        | 7              | 1812                              | 686       | 1727            | 644       | 2.6                | 2.7                |
| Pfizer4        | 8              | 4675                              | 3179      | 2234            | 3604      | 1.5                | 0.6                |
| Pfizer5        | 7              | 3239                              | 999       | 3016            | 992       | 3.2                | 3.0                |
| Pfizer6        | 7              | 1994                              | 1208      | 1521            | 875       | 1.7                | 1.7                |
| Pfizer7        | 7              | 1466                              | 973       | 609             | 636       | 1.5                | 1.0                |
| Pfizer8        | 7              | 3115                              | 953       | 4340            | 726       | 3.3                | 6.0                |
| Pfizer9        | 7              | 888                               | 405       | 1467            | 217       | 2.2                | 6.8                |
| Pfizer10       | 7              | 2315                              | 493       | 1757            | 338       | 4.7                | 5.2                |
| Pfizer11       | 7              | 1418                              | 307       | 860             | 138       | 4.6                | 6.2                |
| Pfizer12       | 7              | 1643                              | 619       | 1749            | 964       | 2.7                | 1.8                |
| Pfizer13       | 7              | 2744                              | 937       | 1851            | 932       | 2.9                | 2.0                |
| Pfizer14       | 7              | 584                               | 216       | 407             | 177       | 2.7                | 2.3                |
| Pfizer15       | 8              | 1823                              | 491       | 1285            | 466       | 3.7                | 2.8                |
| Pfizer16       | 8              | 1094                              | 216       | 1286            | 336       | 5.1                | 3.8                |
| Pfizer17       | 8              | 2358                              | 558       | 1810            | 811       | 4.2                | 2.2                |
| Pfizer18       | 8              | 1872                              | 1227      | 1198            | 474       | 1.5                | 2.5                |
| Pfizer19       | 8              | 983                               | 603       | 466             | 155       | 1.6                | 3.0                |
| Pfizer20       | 8              | 1603                              | 1156      | 1539            | 502       | 1.4                | 3.1                |
| Pfizer21       | 9              | 347                               | 34        | 184             | 39        | 10.3               | 4.7                |
| Pfizer22       | 11             | 678                               | 455       | 1061            | 586       | 1.5                | 1.8                |
| Pfizer23       | 12             | 1149                              | 297       | 1658            | 365       | 3.9                | 4.5                |
| Pfizer24       | 12             | 1082                              | 558       | 1155            | 1036      | 1.9                | 1.1                |
| Pfizer25       | 15             | 3496                              | 2494      | 8092            | 4256      | 1.4                | 1.9                |
| AstraZeneca 1  | 28             | 489                               | 333       | 495             | 235       | 1.5                | 2.1                |
| AstraZeneca 2  | 28             | 440                               | 345       | 580             | 308       | 1.3                | 1.9                |
| AstraZeneca 3  | 28             | 90                                | 12        | 253             | 10        | 7.2                | 25.3               |
| AstraZeneca 4  | 28             | 349                               | 311       | 183             | 101       | 1.1                | 1.8                |
| AstraZeneca 5  | 28             | 681                               | 56        | 432             | 121       | 12.2               | 3.6                |
| AstraZeneca 6  | 28             | 169                               | 30        | 764             | 134       | 5.6                | 5.7                |
| AstraZeneca 7  | 28             | 228                               | 127       | 133             | 10        | 1.8                | 13.3               |
| AstraZeneca 8  | 28             | 333                               | 81        | 257             | 57        | 4.1                | 4.5                |
| AstraZeneca 9  | 28             | 134                               | 106       | 501             | 194       | 1.3                | 2.6                |
| AstraZeneca 10 | 28             | 93                                | 133       | 357             | 217       | 0.7                | 1.6                |
| AstraZeneca 11 | 14             | 192                               | 116       | 334             | 90        | 1.7                | 3.7                |
| AstraZeneca 12 | 14             | 88                                | 51        | 250             | 54        | 1.7                | 4.6                |
| AstraZeneca 13 | 14             | 373                               | 218       | 122             | 26        | 1.7                | 4.8                |
| AstraZeneca 14 | 14             | 188                               | 91        | 212             | 41        | 2.1                | 5.1                |
| AstraZeneca 15 | 14             | 572                               | 87        | 789             | 69        | 6.6                | 11.5               |
| AstraZeneca 16 | 14             | 202                               | 156       | 538             | 201       | 1.3                | 2.7                |
| AstraZeneca 17 | 14             | 763                               | 208       | 1159            | 184       | 3.7                | 6.3                |
| AstraZeneca 18 | 14             | 233                               | 102       | 353             | 122       | 2.3                | 2.9                |
| AstraZeneca 19 | 14             | 1031                              | 443       | 975             | 224       | 2.3                | 4.3                |
| AstraZeneca 20 | 14             | 188                               | 64        | 169             | 30        | 2.9                | 5.7                |
| AstraZeneca 21 | 14             | 224                               | 49        | 155             | 29        | 4.5                | 5.4                |
| AstraZeneca 22 | 14             | 367                               | 49        | 152             | 39        | 7.6                | 3.9                |
| AstraZeneca 23 | 14             | 96                                | 43        | 126             | 27        | 2.3                | 4.7                |
| AstraZeneca 24 | 14             | 612                               | 102       | 293             | 223       | 6.0                | 1.3                |
| AstraZeneca 25 | 14             | 67                                | 32        | 94              | 10        | 2.1                | 9.4                |

**Table S5.** Primer sequences used to generate Pseudoviruses and RBD mutants. Related to Plasmid construction and pseudotyped lentiviral particles production, STAR METHODS.

| Primer                            | Sequence (5' to 3')                                                           |
|-----------------------------------|-------------------------------------------------------------------------------|
| <b>Victoria insert fragments</b>  |                                                                               |
| S247R_F                           | GCTGGCCCTGCACAGAAGATATCTTACACCAGGC                                            |
| S247R_R                           | GCCTGGTGTAAGATATCTTCTGTGCAGGGCCAG                                             |
| <b>B.1.617.1 insert fragments</b> |                                                                               |
| E154K_F                           | CAACAAGAGCTGGATGAAGAGCGAGTTCGCG                                               |
| E154K_R                           | CGCGGAACTCGCTCTTCATCCAGCTCTTGTG                                               |
| L452R_F                           | GGAGGCAATTACAATTACCGGTACAGACTGTTCAGAA<br>AG                                   |
| L452R_R                           | CTTTCTGAACAGTCTGTACCGGTAATTGTAATTGCCTC<br>C                                   |
| E484Q_F                           | CCGTGTAATGGCGTGCAGGGCTTCAATTGCTAC                                             |
| E484Q_R                           | GTAGCAATTGAAGCCCTGCACGCCATTACACGG                                             |
| D614G_F                           | CGTGCTGTACCAGGGCGTGAATTGCACCG                                                 |
| D614G_R                           | CGGTGCAATTCACGCCCTGGTACAGCACG                                                 |
| P681R_F                           | CCCAGACCAATAGCCGTAGAAGAGCCAGAAG                                               |
| P681R_R                           | CTTCTGGCTCTTCTACGGCTATTGGTCTGGG                                               |
| E1072K/K1073R_F                   | CTACGTGCCTGCCAGAAGAGGAATTCACCACCGC                                            |
| E1072K/K1073R_R                   | GCGGTGGTGAAATTCCTCTTCTGGGCAGGCACGTAG                                          |
| T95I_F                            | GCGTGTACTTCGCCAGCATCGAGAAGAGCAATATC                                           |
| T95I_R                            | GATATTGCTCTTCTCGATGTGGCGAAGTACACGC                                            |
| G142D_F                           | GTTCTGCAATGACCCTTTCCTGGATGTTTATTATCATA<br>AGAACAAC                            |
| G142D_R                           | GTTGTTCTTATGATAATAAACATCCAGGAAAGGGTCA<br>TTGCAGAAC                            |
| Q1071H_F                          | CCTACGTGCCTGCCATGAGAAGAATTCACCA                                               |
| Q1071H_R                          | TGGTGAAATTCCTTCTCATGGGCAGGCACGTAGG                                            |
| <b>B.1.617.2 insert fragments</b> |                                                                               |
| T19R_F                            | GCAGCCAGTGCCTGAATCTGAGGACCAGAACCAG                                            |
| T19R_R                            | CTGGGTTCTGGTCCTCAGATTCACGCACTGGCTGC                                           |
| Del156-158_F                      | CAAGAGCTGGATGGAGAGCGTATATTCGTCCGCTAAT<br>AATTGCC                              |
| Del156-158_R                      | GGGCAATTATTAGCCGACGAATATACGCTCTCCATCC<br>AGCTCTTG                             |
| D950N_F                           | CTGGGCAAGCTGCAGAACGTGGTGAATCAGAATG                                            |
| D950N_R                           | CATTCTGATTCACCACGTTCTGCAGCTTGCCAG                                             |
| <b>B.1.1.519 insert fragments</b> |                                                                               |
| T478K_F                           | TACCAGGCCGGCAGCAAACCGTGAATGG                                                  |
| T478K_R                           | CCATTACACGGTTTGCTGCCGGCTGGTA                                                  |
| T732A_F                           | GAAATATTACCAGTCTCCATGGCCAAGACCAGCGTGG                                         |
| T732A_R                           | CCACGCTGGTCTTGCCATGGAGACTGGTAATATTC                                           |
| <b>B.1.429 insert fragments</b>   |                                                                               |
| S13I_F                            | CTGCCTCTGGTGAGCATCCAGTGCCTGAATC                                               |
| S13I_R                            | GATTCACGCACTGGATGCTCACCAGAGGCAG                                               |
| W152C_F                           | CATAAGAACAACAAGAGCTGCATGGAGAGCGAGTTC<br>C                                     |
| W152C_R                           | GGAACCTCGCTCTCCATGCAGCTCTTGTGTTCTTATG                                         |
| P681H_F                           | ACCCAGACCAATAGCCATAGAAGAGCCAGAAGC                                             |
| P681H_R                           | GCTTCTGGCTCTTCTATGGCTATTGGTCTGGGT                                             |
| <b>pcDNA3.1 vector</b>            |                                                                               |
| pcDNA3.1_BamHI_F                  | GGATCCATGTTCTGCTGACCACCAAGAG                                                  |
| pcDNA3.1_Tag_S_EcoRI_R            | GAATTCTCACTTCTCGAACTGAGGGTGGC                                                 |
| pcDNA3.1_Tag_S_EcoRI_F            | GCCACCCTCAGTTCGAGAAGTGAATTC                                                   |
| pcDNA3.1_BamHI_R                  | CTCTTGGTGGTCAGCAGAACATGGATCC                                                  |
| <b>pNEO vector</b>                |                                                                               |
| PV_RBD_F                          | TGATGGGTTGCGTAGCTGAAACCGGTACCATCACCA<br>TCACCATAACCAATCTGTGCCCTTCGGCGAGGTGTTT |
| PV_RBD_R                          | CTGGAACAGCACCTCCAGGGTACCTCACTTTTTGCCG<br>CACACGGTAGCGGGAGC                    |
| pNEO_F                            | GCTGGTTGTTGTGCTGTCTCATC                                                       |
| pNEO_R                            | CGTAAAAGGAGCAACATAG                                                           |
